# Supplementary material for: Propionic acid induces alterations in mitochondrial morphology and dynamics in SH-SY5Y cells
Source: Springer Nature journal article supplement (doi:10.1038/s41598-023-40130-8), 2023-08-15
Supplement: MOESM1 [file 41598_2023_40130_MOESM1_ESM.pdf]

**Supplementary Table S1:** Primer and probe sequences and conditions

| Gene          | Primer sequence (5'-3') |                             | Probe sequence (5'-3')      | Fluorescent dye:Quencher | Cycling Conditions                                                                             | Reference                            |
|---------------|-------------------------|-----------------------------|-----------------------------|--------------------------|------------------------------------------------------------------------------------------------|--------------------------------------|
| <i>cMYC</i>   | Forward                 | ACCACCAGCAGCGACTCTGA        | N/A                         | N/A                      | 95°C for 60s;<br>40 cycles of 95°C for 10s, 60°C for 30s, 72°C for 10s;<br>with melt curve.    | Wang et al., 2018                    |
|               | Reverse                 | TCCAGCAGAAGGTGATCCAGACT     |                             |                          |                                                                                                |                                      |
| <i>DRP1</i>   | Forward                 | TCAACCTCCGCGTCTACTC         | CGTGCTGAACCTGACCCTGGT       | FAM:BHQ-1                | 95°C for 60s;<br>40 cycles of 95°C for 15s, 63°C for 30s and 72°C for 10s;<br>with melt curve. | Kosmider et al., 2019                |
|               | Reverse                 | GATCTGGAACCTGATGTCGGG       |                             |                          |                                                                                                |                                      |
| <i>MFN1</i>   | Forward                 | GAGGTGCTATCTCGGAGACAC       | GGCAGGACAAGCAGTGGAAGA       | Cy5:BMN-Q620 3'          | 95°C for 60s;<br>40 cycles of 95°C for 15s, 63°C for 30s, 72°C for 10s;<br>with melt curve.    |                                      |
|               | Reverse                 | GCCAATCCCACTAGGGAGAAC       |                             |                          |                                                                                                |                                      |
| <i>MFN2</i>   | Forward                 | TGGCTCAAGACTATAAGCTGCG      | AGATTACGGAGGAAGTGGAGAGGCA   | HEX:BHQ-1                | 95°C for 60s;<br>40 cycles of 95°C for 15s, 63°C for 30s, 72°C for 10s;<br>with melt curve.    | Duraismy, Mohammad and Kowluru, 2019 |
|               | Reverse                 | GAGGACTACTGGAGAAGGGTGG      |                             |                          |                                                                                                |                                      |
| <i>NFE2L2</i> | Forward                 | GAGAGCCCAGTCTTGAAC          | TCGCTCAGTTACAAC TAGTAAGAGA  | HEX:BHQ-1                | 95°C for 60s;<br>40 cycles of 95°C for 10s, 60°C for 30s, 72°C for 10s;<br>with melt curve.    | Schrier et al., 2022                 |
|               | Reverse                 | TTGGCTTCTGGACTTGAAC         |                             |                          |                                                                                                |                                      |
| <i>NRF1</i>   | Forward                 | TTGAGTCTAATCCATCTATCCG      | TCGGAACTTCGAGCCACGTTAGA     | Cy5:BMN-Q620 3'          | 95°C for 60s;<br>40 cycles of 95°C for 10s, 60°C for 30s;<br>72°C for 10s; with melt curve.    | Pinho et al., 2022                   |
|               | Reverse                 | TACTTACGCACCACATTCTC        |                             |                          |                                                                                                |                                      |
| <i>OPA1</i>   | Forward                 | AGCCTCGCAGGAATTTTGG         | N/A                         | N/A                      | 95°C for 60s;<br>40 cycles of 95°C for 10s, 60°C for 40s, 72°C for 20s;<br>with melt curve.    | Bean et al., 2021                    |
|               | Reverse                 | AGCCGATCCTAGTATGAGATAGC     |                             |                          |                                                                                                |                                      |
| <i>TFAM</i>   | Forward                 | GTCAGTGCCTCATCCACC          | AAGGTCTGGAGCAGAGCTGTGC      |                          | 95°C for 60s;<br>40 cycles of 95°C for 10s, 60°C for 30s, 72°C for 10s,<br>with melt curve.    | Ye et al., 2022                      |
|               | Reverse                 | CCGCCCTATAAGCATCTT          |                             |                          |                                                                                                |                                      |
| <i>STOML2</i> | Forward                 | GTGACTCTCGACAATGTAAC        | N/A                         | N/A                      | 95°C for 10 min;<br>40 cycles of 95°C for 15s, 62°C for 30s;<br>with melt curve.               | Hu et al., 2018                      |
|               | Reverse                 | TGATCTCATAACGGAGGCAG        |                             |                          |                                                                                                |                                      |
| <i>B2M</i>    | Forward                 | CCAGCAGAGAATGGAAGTCAA       | ATGTGTCTGGGTTTCATCCATCCGACA | CAL Fluor red 610:BHQ-2  | Conditions according to gene of interest                                                       | Grady et al., 2014                   |
|               | Reverse                 | TCTCTCTCCATTCTCAGTAAGTCAACT |                             |                          |                                                                                                |                                      |

**Supplementary Table S2:** Additional information for antibodies

| Protein                                      | Antibody                                      | Source          |
|----------------------------------------------|-----------------------------------------------|-----------------|
| DRP1                                         | DRP1 (D6C7) Rabbit mAb #8570                  | Cell Signalling |
| MFN1                                         | Mitofusin-1 (D6E2S) Rabbit mAb #14739         | Cell Signalling |
| MFN2                                         | Mitofusin-2 (D1E9) Rabbit mAb #11925          | Cell Signalling |
| OPA1                                         | OPA1 (D7C1A) Rabbit mAb #67589                | Cell Signalling |
| HRP-linked anti-rabbit<br>secondary antibody | Anti-rabbit IgG,<br>HRP-linked Antibody #7074 | Cell Signalling |

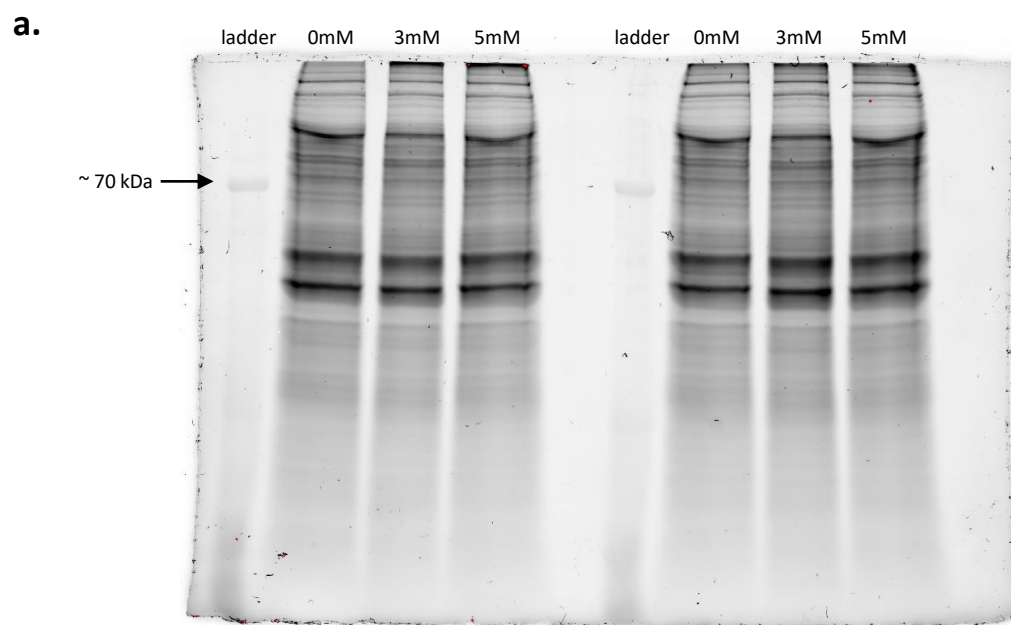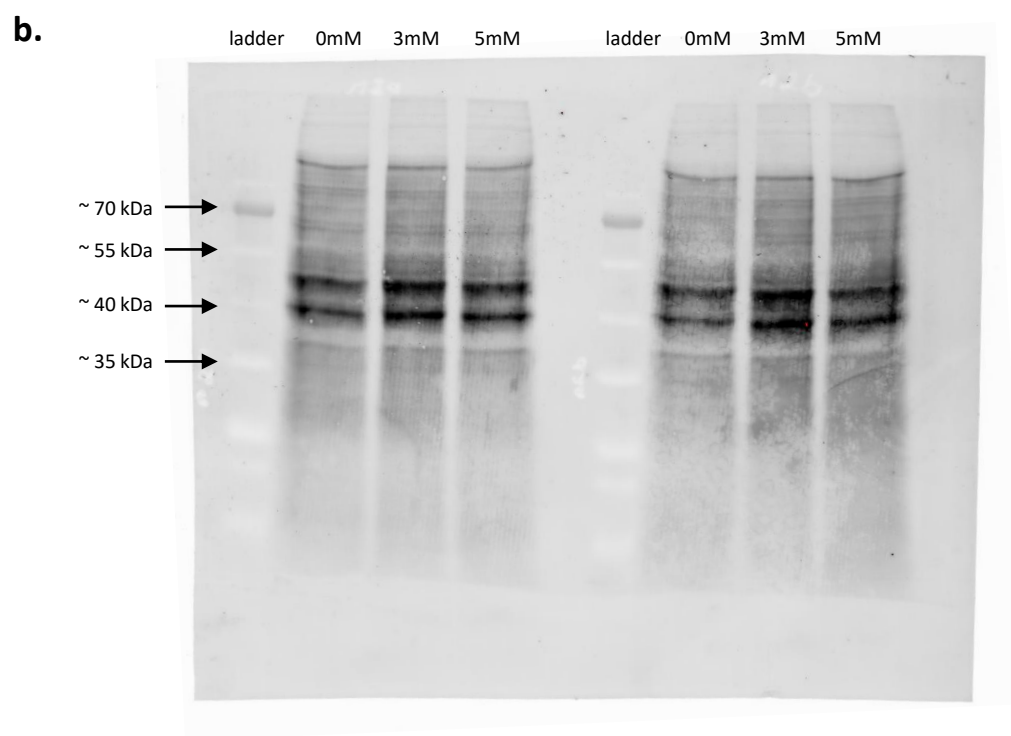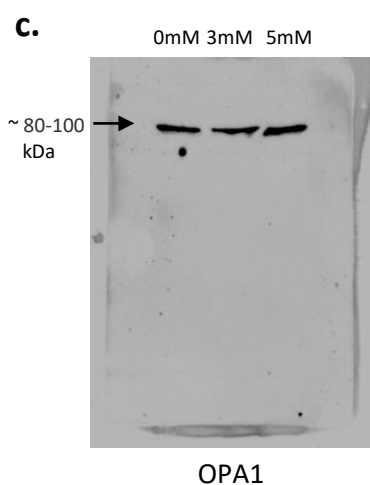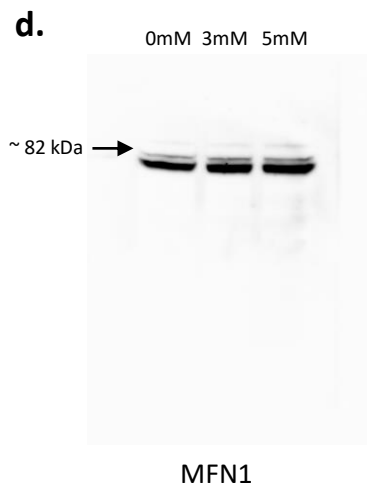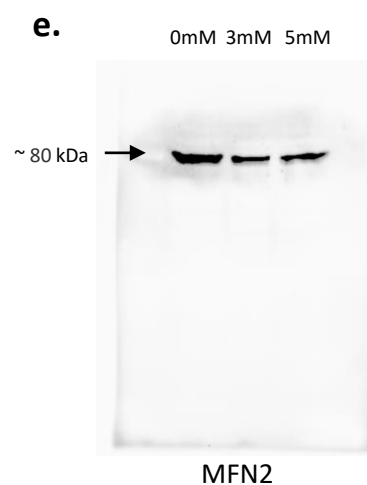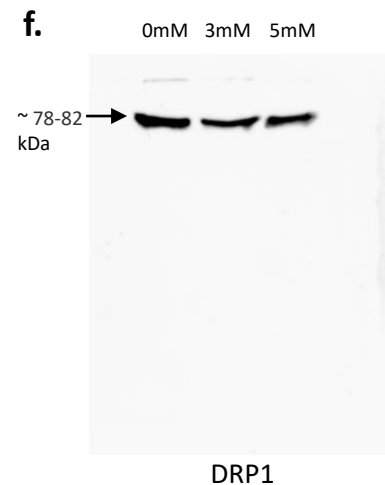

**Supplementary Figure 1:** Representative gels, stain-free image of a PVDF (Polyvinylidene difluoride) membrane, and western blots for proteins OPA1, MFN1, MFN2 and DRP1. SH-SY5Y cells were treated with 3 and 5 mM PPA for 24 hours. Densitometric analysis of western blots was used to analyse protein abundance which was normalized to the total protein of the control lane. **a.** Representative stain-free 10-well acrylamide gel image post electrophoresis. **b.** Representative stain-free blot image showing total protein post electrophoretic transfer. Chemiluminescence images of **c.** OPA1, **d.** MFN1, **e.** MFN2 and **f.** DRP1. Data shown is representative of  $n = 3$  biological repeats.
